# Supplementary material for: A Comparative Study of 5S rDNA Non-Transcribed Spacers in Elaeagnaceae Species
Source: MDPI journal article supplement (doi:10.3390/plants10010004), 2020-12-23
Supplement: s1 [file s1]

**Table S1.** The sequences of NTSs and their characteristics.

| Species                | Variety | Code   | Sequence                                                                                                                                                                                                                     | Length, bp | GenBank  |
|------------------------|---------|--------|------------------------------------------------------------------------------------------------------------------------------------------------------------------------------------------------------------------------------|------------|----------|
| <i>E. angustifolia</i> |         | Eang34 | TTTTCTTGCAATTATTTGTAGTTCGATCAACCGAATCAAACAAACATCATCACCCCTTAAT<br>TTTTTCGATAATCTCTTCTGAGCCATTCATTTCACTATTATTGCTTCCTTATTTATAA<br>CTTCTCGAACGTACTAAGTATATCTTTTCATTCGCAAAAATAACAAGTTTCGTTATCTAA<br>TTATATTTAGATGTCCAATTTCTAAT    | 207        | MW288958 |
|                        |         | Eang38 | CATTTCTTGCAATTATATGTAGTTCGATCACCCGAATCAAACAAACATCATCACCCCTTAAT<br>TTTTTGGATAATCTCTTCTGAGCCATTCATTTCACTATTATTGCTTCCTTATTCATAA<br>TTTCTCGAACGTATTAAGTATATCTTTTCATTCGCAAAAATAACAAGTTTCGTTATCTAA<br>TTATATTTAGATGTCCAATTTCTAAT   | 207        | MW288959 |
|                        |         | Eang39 | TTTTCTTGCAATTATTTGTAGTTCGATCAACCGAATCAAACAAACATCATCACCCCTTAAT<br>TTTTTCGATAATCTCTTTGAGCCATTCATTTCACTATTATTGCTTCCTTATTTATAA<br>CTTCTCGAACGTACTAAGTATATCTTTTCACTCGCAAAAATAACAAGTTTCGTTATCTAA<br>TTATATTTAGATGTCCAATTTCTAAT     | 207        | MW288960 |
|                        |         | Eang41 | TTTTCTTGCAATTATTTGTAGTTCGATTCCCGAATCAAACAAACATCATTACCCTTAATT<br>TTTGGGATAATCTCTTCTGAGCCATTCATTTCACTTTTATTGCTTCCTTATTTACAAC<br>TTCTCGAACGTACTAAGTATATCTTTTCATTCGCAAAAATAACAAGTTTCGTTATCTAAT<br>TATATTTAGATGTCCAATTTCTAATT     | 207        | MW288961 |
|                        |         | Eang42 | CTTTTCTTGCAATTATATGTAGTTCGATCACCCGAATCAAACAAACATCATCACCCCTTAAT<br>TTTTTGGATAATCTCTTCTGAGCCATTCATTTCACTATTATTGCTTCCTTATTTATAA<br>CTTCTCGAACGTACTAAGTATATCTTTTCATTCGCAAAAATAACAAGTTTCGTTATCTAA<br>TTATATTTAGATGTCCAATTTCTAAA   | 207        | MW288962 |
|                        |         | Eang43 | TTTTCTTGCAATTATATGTAGTTCGATCAACCGAATCAAACAAACATCATCACCCCTTAAT<br>TTTTTCGATAATCTCTTCTGAGCCATTCATTTCACTATTATTGCTTCCTTATTTATAA<br>CTTCTCGAACGTACTAAGTATATCTTTTCATTCGCAAAAATAACAAGTTTCGTTATCTAA<br>TTATATTTAGATGTCCAATTTCTAAT    | 207        | MW288963 |
| <i>E. commutata</i>    |         | Ecom45 | ATTTTTGCTCTATTTTATTCTAATCCGATAAACCGAATTGTTTAAATCCAATAAATCATA<br>ATTTTTGCGATAACATATTCAAACCGTTCAATCTATACTTCAATTACTTCCATAACTAC<br>AATTTATCGAAAGTAACTTGTATATGTTTACGCACGCATGAAATACTTTACCCGTACAAA<br>TCTTATAATTAGATGTCGAAAGTTGTGAT | 209        | MW288964 |
|                        |         | Ecom47 | ATTTTTGCTCTATTTTATTCTAATCCGATAAACCGAATTGTTTAAATCCAATAAATCATA<br>ATTTTTGCGATAACATATTCAAACCGTTCAATCTATACTTCAATTACTTCCATAACTAC                                                                                                  | 209        | MW288965 |

|               |  |         |                                                                                                                                                                                                                                 |     |          |
|---------------|--|---------|---------------------------------------------------------------------------------------------------------------------------------------------------------------------------------------------------------------------------------|-----|----------|
|               |  |         | AATTTATCGAAAGTAACTGGTATATGTTTACGCACGCATGAAATACTTTACCCGTACAAA<br>TCTTATAATTAGATGTCGAAAGTTGTGAT                                                                                                                                   |     |          |
|               |  | Ecom48  | TTTTTGCCTCTTTTATTCTAATCCGATAAACCGAATTGTTTAAATCTAATAAATCATAA<br>TTTTTGCATAACTTATTCAAACCGTTCAATCTATACTTCAATTACTTCCTTAACTACA<br>ATTTATCGAAAGTAACTTGTATATGTTTACGCACACATGAAAACTTTACCCGTACAAAT<br>CTTATAATTAGATGTCGAAAGTTGTGAT        | 208 | MW288966 |
|               |  | Ecom49  | TTTTTGCCTCTTTTATTCTAATCCGATAAACCGAATTGTTTAAATCTAATAAATCATAA<br>TTTTTGCATAACTTATTCAAACCGTTCAATCTATACTTCAATTACTTCCTTAACTACA<br>ATTTATCGAAAGTAACTTGTATATGTTTACGCACACATGAAAACTTTACCCGTACAAAT<br>CTTATAATTAGATGTCGAAAGTTGTGAT        | 208 | MW288967 |
|               |  | Ecom50  | TTTTTGCTCTCTTTTATTCTAATCCGATAAACCGAATTGTTTAAATCCAATAAACCATAA<br>TTTTTGCATAACCTCTTCAAACCGTTCAATCTATACTTAAATTACTTCCTTAACTACA<br>ATTTATCGAAAGTAACTTGTATATGTTTACGCACGCATGAAAACTCTACCCGTACAAAT<br>CTTATAATTAGATGTCGAAAGTTGTGAT       | 208 | MW288968 |
| E. multiflora |  | Emult51 | TTTTTGGCGCATTTATTGCTTTCAGAATTCAACATTCCAAATCATTCAAATTCCTGACA<br>CATATTTTTTGCTACATCATCAGTCCAACATTTTCACTGATATTTTTATTATTGTCGTTA<br>CCATAACTTTCAGAATGTACTAAATAGACGTTACGAATGCATGTAGAACGTTATTGAA<br>CTCCTCTTATGATAAGATGTCGAAGTTTATAAC  | 213 | MW288969 |
|               |  | Emult53 | TTTTTGGCGCATTTATTGCCTTCGGAATTCAATATTCCAAATCATTCAAATTCATGACA<br>CATATTTTTTGCTACATCATCAGTCCAACATTTTCACTGATATTTTTATTATTGTCATTA<br>CCATAACTTTTAAATGTACTAAATAGACGTTACGCATGCATGTAGAACGATATTGAA<br>ATCCTCTTATGATAAGATGTCGAAGTTTATAAC   | 213 | MW288970 |
|               |  | Emult54 | TTTTTGGCGCATTTATTGCTTTCAGAATTCAACATTCCAAATCATTCAAATTCCTGACA<br>CATATTTTTTGCTACATCATCAGTCCAACATTTTCACTGATATTTTTATTATTGTCGTTA<br>CCATAACTTTCAGAATGTACTAAATAGACGTTACGAATGCATGTAGAACGTTATTGAA<br>CTCCTCTTATGATAAGATGTCGAAGTTTATAAC  | 213 | MW288971 |
|               |  | Emult57 | TTTTTGGCGCATTTATTGCTTTCAGAATTCAATATTCCAAATCATTCAAATTCGAAGACA<br>CATATTTTTTGCTACATCATCAGTCCAACATTTTCACTGATATTTTTATTATTGTCGTTA<br>CCATAACTTTCAGAATGTACTAAATAGACGTTACGCATGCATGTAGAACGATATTGAA<br>CACCTCTTATGATACGATGTCGAAGTTTATAAC | 213 | MW288972 |
|               |  | Emult61 | TTTTTCGCGCATTTATTGCTTTCAGAATTCAATATTCCAAATCATTCAAATTCATGAC<br>ACATATTTTTCTACATCATCAGTCCAACATTTTCACTGATATTTTTATTATTGTCGTT<br>ACCATAACTTTCAGAATGTACTAAATAGACGTTACATGCATGCATGTAGAACGATATTGAA<br>ACTCCTCTTATGATAAGATGTCGAAGTTTATAAC | 214 | MW288973 |

|              |              |          |                                                                                                                                                                                                                                   |     |          |
|--------------|--------------|----------|-----------------------------------------------------------------------------------------------------------------------------------------------------------------------------------------------------------------------------------|-----|----------|
| E. pungens   | 'Maculata'   | Epung64  | TTTTGCCGCATTTATTGACTTCAGAATTCGTTATTCCAAATCATTCAAATTTTCATGAAA<br>TATATTTTTTGCTAAATCTTCTTTGCAACTTTTCTACTTATACTTTATTTTTATCGTTA<br>CCATAAGTTTAAGAATGTACTAAATAGACGTTTCATGCATGCATGTAGAACGATATTGAA<br>CTCTTCTTATGATTTGGTTTCGAAGTTTATAAC  | 213 | MW288974 |
|              |              | Epung65  | CTTTGCCGCATTTATTGATCTAAGGATTGCTATTCCAAATCATTCAAATTTTCATGAAA<br>CATATTTTTTGCTAAATCATCTTTCCAACTTTCTACTTATACTTTATTTTTGTCGTTA<br>CCATAAGTTTAAGAATGTACTAAATAGACGTTTCATGCATGCATGTAGAACGATATTGAA<br>CTCTTCTTATGATTTGGTTTCGATGTTTATAAC    | 213 | MW288975 |
|              |              | Epung72  | CTTTGCCGCATTTATTGATCTCAGAATTCGATATTCCAAATCATTCAAATTTTCATGAAA<br>CATATTTTTTGCTAAATCATGTTTCCAACTTTCTACTTACACTTTATTTTTATCGTTA<br>CCATAAGTTTAAGAATGTACTAAATAGACGTTTCATGCATGCATGTAGAACGATATTGAA<br>CTCTTCTTATGATTTGGTTTCGAAGTTTATAAC   | 213 | MW288976 |
| E. umbellata | Sweet'n'Sour | EumbSS75 | TTTTGGCGCATTTATTGCTTTCAGAATTCAATATTCCAAATCATTCAAATTTCCAAGACA<br>CATATTTTTTGCTACATCATCAGTCCAACATTTTCACTGATATTTTTATTATTGTCGTTA<br>CCATAACTTTCAGAATGTACTAAATAGACGTTTCACGCATGCATGTAGAACGATATTGAA<br>CTCCTCTTATGATAAGATGTCGAAGTTTATAAC | 213 | MW288989 |
|              | Fortunella   | EumbF79  | TTTTGGCGCATTTATTGCTTTCAGAATTCAATATTCCAAATCATTCAAATTTCCAAGACA<br>CATATTTTTTGCTACATCATCAGTCCAACATTTTCAAGATATTTTAATTATTGTCGTTA<br>CCATAACTTTCAGAATATACTAAATAGACGTTTCACACATGCATGTAGAACGATATTGAA<br>CTCCTCTTATGATAAGATGTCGAAGTTTATAAC  | 213 | MW288977 |
|              |              | EumbF82  | TTTTGGTGCATTTATTGCTTTCAGAATTCAATATTCCAAATCATTCAAATTTCCCTGACA<br>CATATTTTTTGCTACATCATCAGTCCAACATTTTCACTGATATTTTTATTATTGTCGTTA<br>CCATAACTTTCATAATGTACTAAATAGACGTTTCACGCATGCATGTAGAACGATATTGAA<br>CACCTCTTATGATAAGATGTCGAAGTTTATAAC | 213 | MW288978 |
|              |              | EumbF84  | TTTTGGTGCATTTATTGCTTTCAGAATTCAATATTCCAAATCATTCAAATTTCCCTGACA<br>CATATTTTTTGCTACATCATCAGTCCAACATTTTCACTGATATTTTTATTATTGTCGTTA<br>CCATAACTTTCATAATGTACTAAATAGACGTTTCACGCATGCATGTAGAACGATATTGAA<br>CACCTCTTATGATAAGATGTCGAAGTTTATAAC | 213 | MW288979 |
|              |              | EumbF85  | TTTTGGCGCATTTATTGCTTTTGAATTCAGAATTCCAAATCATTCAAATTTCCAACACA<br>CATATTTTTTGCTACATCATCAGTCCAACATTTTCACTGATATTTTTATTATTGTCGTTA<br>CCATAACTTTCAGAATGTACTAAATAGACGTTTACGCATGCATGTAGAACGATATTGAA<br>CACCTCTTATGATAGGATGTCGAAGTTTATAAC   | 213 | MW288980 |
|              |              | EumbF86  | TTTTGGTGCATTTATTGCTTTCAGAATTCAATAGTCCAAATCATTCAAATTTCCAAAACA<br>CATATTTTTTGCTACATCATCAGTCCAACATTTTCTCTGATATTTTTATTATTGTCGTTA                                                                                                      | 213 | MW288981 |

|  |                 |           |                                                                                                                                                                                                                                       |     |          |
|--|-----------------|-----------|---------------------------------------------------------------------------------------------------------------------------------------------------------------------------------------------------------------------------------------|-----|----------|
|  |                 |           | CCATAACTTTT CAGAATGTACTAAATAGACGTTACGCGATGCATGTAGAACGATATT CGAA<br>CTCCTCTTATGATAAGATGTCGAAGTTTATAAC                                                                                                                                  |     |          |
|  | Brilliant Rose  | EumbBR88  | TTTTTGGCGCATTTATTGCTTT CAGAATTCAATATTCCAAATCATACAAATTCCATGACA<br>CATATTTTTTGCTACATCACCAGTCCAACATTTTCACTGATATTTTTATTATTGTCGTTA<br>CCATAACTTT CAGAATGTACTAAATAGACGTTACGCGATGCATGTATAACGATATT CGAA<br>CTCCTCTTATGATAAGATGTCGAAGTTTATAAC  | 213 | MW288982 |
|  |                 | EumbBR89  | ATTTTTGGCGCATTTATAGCTTT CAGAATTCAATATTCCAAATCATTCAAATTCCAAGAC<br>CCATATTTTTTGCTACATCATCAGTCCAACATTTTCACTGATATTTTTATTATTGTCGTT<br>ACCATAACTTT CAGAATGTACTAAATAAACGTTACGCGATGCATGTAGAACGATATT CGA<br>ACTCTTCTTATGATAAGATGTCGAAGTTTATAAC | 214 | MW288983 |
|  |                 | EumbBR91  | TTTTTGGCGCATTTATTGCTTT CGGAATTCAATATTCCAAATCATTCAAATTCCATGACA<br>CATATTTTTTGCTACATCATCAGTCCAACATTTTCACTGATATTTTTATTATTGTCGTTA<br>CCATAACTTT GAGAATGTACTAAATAGACGTTACGCGATGCATGTAGAACGATATT CGAA<br>CACCTCTTATGATACGATGTCGAAGTTTATAAC  | 213 | MW288984 |
|  |                 | EumbBR92  | TTTTTGGCGCATTTATTGCTTT CAGAATTCAATATTCCAAATCATTCAAATTCCAAGACA<br>CATAATTTTTACTACATCATCAGTCCAACATTTTCACTGATATTTTTATTATTGTCGTTA<br>CCATAACTTT CAGAATGTACTAAATAGACGTTACGCGATGCATGTAGAACGATATT CGAA<br>CTCTTCTTATGATAAGATGTCGAAGTTTATAAC  | 213 | MW288985 |
|  |                 | EumbBR98  | TTTTTGGCACATTTATTGCTTT CAGAATTCAATATTCCAAATCATTCAAATTCCAAGACA<br>CATATTTTTTGCTACATCTTAGTCCAACATTTTCACTGATATTTTTGTTATGTTTCGTTA<br>CCATAACTTT CAGAATGTACTAAATAGACGTTACGAATGCATGTAGAACGATATT CGAA<br>CTCCTCTTATGATAAGATGTCGAAGTTTATAAC   | 213 | MW288986 |
|  |                 | EumbBR100 | TTTTTGGCGCATTTATTGCTTTT AGAATTCAATATTCCAAATCATTCAAATTCCTGACA<br>CATATTTTTTGCTACATCATCAGTCCAACATTTTCACTGATATTTTTATTATTGTCGTTA<br>CCATAACTTT CAGAATGTACTAAATAGACGTTACGCGATGCATGTAGAACGATATT CGAA<br>CTCTTCTTATGATAAGATGTCGAAGTTTATAAC   | 213 | MW288987 |
|  |                 | EumbBR101 | ATTTTTGGCGCATTTATTGCTTT CAGAATTCAATATTCCGAATCATTCAAATTCCAAGAC<br>ACATATTTTTTGCTACATCATCAGTCCAACATTTTCACTGATATTTTTATTATTGTCGTT<br>ACCATAACTTT CAGAATGTACTAAATAGACGTTACGCGATGCATGTGGAACGATATT CGA<br>ACTCCTCTTATGATAAGATGTCGAAGTTTACAAC | 214 | MW288988 |
|  | without variety | EumbB104  | TTTTTGGCACATTTATTGCTCTTAGAATTCAATATTCCAAATCATTCAAATTCATGACA<br>CATATTTTTTGCTACATCACCCGTCCAACATTTTCACTGATATTTTTATTATTGTCATTA<br>CCATAACTTT CAAAATGTACTAAATAGACGTTACGCGATGCATGTAGAACGATATT CGAA<br>CTCCTCTTATGATAAGATGTCGAAGTTTGTAAAC   | 213 | MW288990 |

|  |  |          |                                                                                                                                                                                                                                   |     |          |
|--|--|----------|-----------------------------------------------------------------------------------------------------------------------------------------------------------------------------------------------------------------------------------|-----|----------|
|  |  | EumbB109 | TTTTGGCGAATTTATTGCTTTCAGAATTCAATATTCCAAATCATTCAAATTTCTGACA<br>CATATTTTTTGCTACATCATCAGTCCAACATTTTCACTGATATTTTTATTATTGTCGTTA<br>CCATAACTTTCAGAATGTACTAAATAGACGTTACGCATGCATGTATAACGATATTGGAA<br>CTCCTCTTATGATAAGATGTCGAAGTTTATAAC    | 213 | MW288991 |
|  |  | EumbB110 | TTTTGGCGCATTTATTGCTTTCAGAATTCAATATTCCAAATCATTCAAATTTCTATGACA<br>CATATTTTTTGATAACATCATCAGTCCAACATTTTCACTGATATTTTTATTATTGTCGTTA<br>CCATAACTTTCAGAATGTACTAAATAGACGTTACGCATGCATGTAGAACGATATTCGAA<br>CTCCTCTTATGATAAGATGTCGAAGTTTATAAC | 213 | MW288992 |
|  |  | EumbB111 | TCTTTGGCTCATTTATTGCTTTCAGAATTCAATATTCCAAATCATTCAAATTTCTATGACA<br>CATATTTTTTGCTACATCATCAGTACAACATTTTCACTGATATTTTTATTATTGTCATTA<br>CCATAACTTTCAGAATGTACTAAATAGACGTTACGCATGCATGTAGAACGATATTCGAA<br>CTCCTCTTATGATAAGATGTCGAAGTTTATAGC | 213 | MW288993 |
|  |  | EumbB112 | TTTTGGCGCATTTATTGCTTTCACAATTCAATATTCCAAATCATTCAAATTCCTGACA<br>CATATTTTTTGCTACATCATCAGTCCAACATTTTCACTGATATTTTTATTATTGTCGTTA<br>CCATAACTTTAGAATGTACTAAATAGACGTTACGCATGGATGTAGAACGATATTCGAA<br>CTCCTCTTATGATAAGATGTCGAAGTTTATAAC     | 213 | MW288994 |
|  |  | EumbB113 | TTTTGGCGCATTTATTGCTTTCAGAATTCAATATTCCAAATCATTCAAATTTCTATGACA<br>CATATTTTTTGCTACATCATCAGTCCAACATTTTCACTGATATTTTTATTATTGTCGTTA<br>CCATAACTTTCAGAATGTCCTAAATAGACGTTACGCATGCATGTAGAACGATATTCGAA<br>CTCCTCTTATGATATGATGTCGAAGTTTATAAC  | 213 | MW288995 |
|  |  | EumbB115 | TCTTTGGCTCATTTATTGCTTTCAGAATTCAATATTCCAAATCATTCAAATTTCTATGACA<br>CATATTTTTTGCTACATCATCAGTACAACATTTTCACTGATATTTTTATTATTGTCATTA<br>CCATAACTTTCAGAATGTACTAAATAGACGTTACGCATGCATGTAGAACGATATTCGAA<br>CTCCTCTTATGATAAGATGTCGAAGTTTATAGC | 213 | MW288996 |
|  |  | EumbB116 | TTTTGGCGCATTTATTGCTTTCAGAATTCAACATTCCAAATCATTCAAATTCATGACA<br>CATATTTTTTGCTACATCATCAGTCCAACATTTTCACTGATATTTTTATTATTGTCGTTA<br>CAATAACTTTCAGAATGTATTAATAGACGTTACGCATGCATGTAGAACGATATTCGAA<br>CTCCTCTTATGATAAGATGTCGAAGTTTGCAAC     | 213 | MW288997 |
|  |  | EumbB117 | TCTTTGGCTCATTTATTGCTTTCAGAATTCAATATTCCAAATCATTCAAATTTCTATGACA<br>CATATTTTTTGCTACATCATCAGTACAACATTTTCACTGATATTTTTATTATTGTCATTA<br>CCATAACTTTCAGAATGTACTAAATAGACGTTACGCATGCATGTAGAACGATATTCGAA<br>CTCCTCTTATGATAAGATGTCGAAGTTTATAGC | 213 | MW288998 |
|  |  | EumbB118 | TTTTGGCGAATTTATTGCTTTCAGAATTCAATATTCCAAATCATTCAAATTTCTGACA<br>CATATTTTTTGCTACATCATCAGTCCAACATTTTCACTGATATTTTTATTATTGTCGTTA                                                                                                        | 213 | MW288999 |

|              |  |          |                                                                                                                                                                                                                                       |     |          |
|--------------|--|----------|---------------------------------------------------------------------------------------------------------------------------------------------------------------------------------------------------------------------------------------|-----|----------|
|              |  |          | CCATAACTTTT CAGAATGTACTAAATAGACGTTACGCGATGCATGTATAACGATATTGGAA<br>CTCCTCTTATGATAAGATGTCGAAGTTTATAAC                                                                                                                                   |     |          |
|              |  | EumbB119 | TTTTTGGCGAATTTATTGCTTT CAGAATTCAATATTCCAAATCATTCAAATTCTCTGACA<br>CATATTTTTTTGCTACATCATCAGTCCAACATTTTCACTGATATTTTTATTATTGTCGTTA<br>CCATAACTTTT CAGAATGTACTAAATAGACGTTACGCGATGCATGTATAACGATATTGGAA<br>CTCCTCTTATGATAAGATGTCGAAGTTTATAAC | 213 | MW289000 |
|              |  | EumbB120 | TTTTTGGCGAATTTATTGCTTT CAGAATTCAATATTCCAAATCATTCAAATTCTCTGACA<br>CATATTTTTTTGCTACATCATCAGTCCAACATTTTCACTGATATTTTTATTATTGTCGTTA<br>CCATAACTTTT CAGAATGTACTAAATAGACGTTACGCGATGCATGTATAACGATATTGGAA<br>CTCCTCTTATGATAAGATGTCGAAGTTTATAAC | 213 | MW289001 |
|              |  | EumbB121 | TTTTTGGCGCATTTATTGCTTT CACAATTCAATATTCCAAATCATTCAAATTCCTGACA<br>CATATTTTTTTGCTACATCATCAGTCCAACATTTTCACTGATATTTTTATTATTGTCGTTA<br>CCATAACTTTT AGAATGTACTAAATAGACGTTACGCGATGGATGTAGAACGATATTGAA<br>CTCCTCTTATGATAAGATGTCGAAGTTTATAAC    | 213 | MW289002 |
|              |  | EumbB124 | TTTTTGGCGCATTTATTGCTTT CAGAATTCAATATTCCAAATCATTCAAATTCGAAGACA<br>CATATTTTTTTGCTACATCATCAGTCCAACATTTTCACTGATATTTTTATTATTGTCGTTA<br>CCATAACTTTT CAGAATGTACTAAATAGACGTTACGCGATGCATGTATAACGATATTGAA<br>CTCCTCTTATGATAAGATGTCGAAGTTTATAAC  | 213 | MW289003 |
|              |  | EumbB125 | TTTTTGGTGCATTTATTGCTTT CACAATTCAATATTCCAAATCATTCAAATTCCTGACA<br>CATATTTTTTTGCTACATCTCCAGTCCAACATTTTCACTGATATTTTTATTATTGTCGTTT<br>CCATAACTTTT CAGAATGTACTAAATAGACGTTACGCGATGCATGTAGAACGATATTGAA<br>CACCTCTTATGATAAGATGTCGAAGTTTATAAC   | 213 | MW289004 |
|              |  | EumbB126 | TTTTTGGCGCATTTATTGCTTT CAGAATTCAATATTCCAAATCATTCAAATTCATGACA<br>CATATTTTTTTGATACATCATCAGTCCAACATTTTCACTGATATTTTTATTATTGTCGTTA<br>CCATAACTTTT CAGAATGTACTAAATAGACGTTACGCGATGCATGTAGAACGATATTGAA<br>CTCCTCTTATGATAAGATGTCGAAGTTTATAAC   | 213 | MW289005 |
| Sh. argentea |  | Sharg5   | CACCTCCTTCCCTTTTTTTTTTTTTTTT CAGAAAACGAATACGTTAATATATGTTACAATC<br>AATAAATAGAGTTTACATTGCTTATTCTTTCTTATACATAAACGTTGAAATCTATAAT                                                                                                          | 119 | MW288952 |
|              |  | Sharg8   | CTTTTCCCCCTTTTTTTTTTTTTTTT CAGAAAACGAATACGTTAATATATGTT<br>ACAATCAATAAATAGAGTTTACATTGCTTATTCTTTCTTATACATAAACGTTGAAATCT<br>ATAAT                                                                                                        | 125 | MW288953 |
|              |  | Sharg9   | CTCTTCCCCCACTTTTTTTTTTTTTTTT CAGAAAACGAATACGTTAATATATGTTACAATCAA<br>TAAATAGAGTTTACATTGCTTATTCTTTCTTATACATAAACGTGGAAATCTATAAT                                                                                                          | 117 | MW288954 |
|              |  | Sharg10  | CTCTTCCCCCACTTTTTTTTTTTTTTTT CAGAAAACGAATACGTTAATATATGTTACAATC                                                                                                                                                                        | 119 | MW288955 |

|                   |  |         |                                                                                                                                                                         |     |          |
|-------------------|--|---------|-------------------------------------------------------------------------------------------------------------------------------------------------------------------------|-----|----------|
|                   |  |         | AATAAATAGAGTTTACATTGCTTATTCTTTCTTATACATAAACGTTGAAATCTATAAT                                                                                                              |     |          |
|                   |  | Sharg14 | CCTTTTCCCCCCCCCTTTTTTTTTTTTTTTTTTTTTTTTTTTTTTTTTTTTCAGAAAAC<br>GAATACGTTAATATATGTTACAATCAATAAATAGAGTTTACATTGCTTATTCTTTCTTA<br>TACATAAACGTTGAAATCTATAAT                  | 144 | MW288956 |
| Sh.<br>canadensis |  | Shcan25 | TTTTTCCATCTCATTACATTTTTTTTTTCCGGTACGAAATGCCTTATTCTTGTTTATAAA<br>AATAATGTTAATACTTCTTAACATTAATTTGAAAAATTAAAGACCGCAAAAAACAATTT<br>ATAAGATCTCTTCTTATATGTAATAAGTGGTTCATCTGAC | 160 | MW288957 |
