# Supplementary material for: A Comparative Study of 5S rDNA Non-Transcribed Spacers in Elaeagnaceae Species
Source: MDPI journal article supplement (doi:10.3390/plants10010004), 2020-12-23
Supplement: s1 [file s1]

**Table S4.** Mutations in the *Elaeagnus* spp. NTSs

| Mutation | Number of mutations | Number of transitions | Number of tranversions | Total |
|----------|---------------------|-----------------------|------------------------|-------|
| C/T      | 43                  | 63                    |                        | 129   |
| A/G      | 20                  |                       |                        |       |
| T/G      | 8                   |                       | 66                     |       |
| A/C      | 21                  |                       |                        |       |
| A/T      | 28                  |                       |                        |       |
| C/G      | 9                   |                       |                        |       |
