# Supplementary material for: A Comparative Study of 5S rDNA Non-Transcribed Spacers in Elaeagnaceae Species
Source: MDPI journal article supplement (doi:10.3390/plants10010004), 2020-12-23
Supplement: s1 [file s1]

**Table S3.** Mutations in the *Elaeagnus umbellata* NTSs

| Variety         | Mutation | Positions                                   | Number of transitions | Number of tranversions | Total |
|-----------------|----------|---------------------------------------------|-----------------------|------------------------|-------|
| Fortnella       | C/T      | 8, 23, 153                                  | 6                     |                        | 14    |
|                 | A/G      | 137, 156, 195                               |                       |                        |       |
|                 | T/G      | 35, 133                                     | 8                     |                        |       |
|                 | A/C      | 55                                          |                       |                        |       |
|                 | A/T      | 56, 96, 98, 107, 182                        |                       |                        |       |
|                 | C/G      |                                             |                       |                        |       |
| Brilliant Rose  | C/T      | 24, 81, 82, 185, 211                        | 12                    |                        | 26    |
|                 | A/G      | 10, 25, 40, 72, 109, 148, 167               |                       |                        |       |
|                 | T/G      | 114, 115, 168                               | 14                    |                        |       |
|                 | A/C      | 56, 61, 158, 196                            |                       |                        |       |
|                 | A/T      | 18, 47, 57, 66, 80, 183                     |                       |                        |       |
|                 | C/G      | 132                                         |                       |                        |       |
| without variety | C/T      | 2, 8, 21, 23, 33, 53, 54, 80, 131, 140, 210 | 15                    |                        | 32    |
|                 | A/G      | 117, 133, 209, 212                          |                       |                        |       |
|                 | T/G      | 167                                         | 17                    |                        |       |
|                 | A/C      | 10, 55, 72, 82, 85, 122, 139                |                       |                        |       |
|                 | A/T      | 56, 79, 120, 182, 195                       |                       |                        |       |
|                 | C/G      | 25, 161, 177, 205                           |                       |                        |       |
