# Supplementary material for: A Comparative Study of 5S rDNA Non-Transcribed Spacers in Elaeagnaceae Species
Source: MDPI journal article supplement (doi:10.3390/plants10010004), 2020-12-23
Supplement: s1 [file s1]

**Table S9.** The studied plants of *Elaeagnus* and *Shepherdia* species.

| Species                       | Variety                  | Code                       | Origin                                                          | Coordinates or greenhouse/dried material |
|-------------------------------|--------------------------|----------------------------|-----------------------------------------------------------------|------------------------------------------|
| <i>Elaeagnus angustifolia</i> |                          | Eang                       | “Martin Sad” nursery, Mytisch, Russia                           | 55°41’49.65”<br>36°84’83.48”             |
| <i>Elaeagnus commutata</i>    |                          | Ecom                       | Street planting in “KIZ Allea”, Kievsky village, Moscow, Russia | 55°41’69.27”<br>36°84’76.71”             |
| <i>Elaeagnus multiflora</i>   |                          | Emult                      | “Nara-Sad” nursery, Naro-Fominsk, Russia                        | 55°41’48.48”<br>36°84’79.92”             |
| <i>Elaeagnus pungens</i>      | “Maculata”               | Epung                      | “Opt-khoz” nursery, Ozery, Russia                               | greenhouse                               |
| <i>Elaeagnus umbellata</i>    | “Pointilla Sweet’n’Sour” | EumbSS                     | “Darvin” nursery, Moscow, Russia                                | 55°41’48.64”<br>36°84’85.38”             |
|                               | “Pointilla Fortunella”   | EumbF                      | “Sad pochtoj” nursery, St. Petersburg, Russia                   | greenhouse                               |
|                               | “Brilliant Rose”         | EumbBR                     | “Sad pochtoj” nursery, St. Petersburg, Russia                   | greenhouse                               |
|                               | without variety          | EumbB                      | “Sad pochtoj” nursery, St. Petersburg, Russia                   | greenhouse                               |
| <i>Shepherdia argentea</i>    |                          | Sharg<br>(AA#102-77*A)     | Arnold Arboretum, The Harvard University, USA                   | dried material                           |
| <i>Shepherdia canadensis</i>  |                          | Shcan<br>(*19801643-I34ZZ) | Botanic Garden Meise, Nieuwelaan, 38, 1860 Meise, Belgium       | dried material                           |
