# Supplementary material for: A Comparative Study of 5S rDNA Non-Transcribed Spacers in Elaeagnaceae Species
Source: MDPI journal article supplement (doi:10.3390/plants10010004), 2020-12-23
Supplement: s1 [file s1]

**Table S8.** A comparative analysis of the average levels of interspecies (intervariety for *Elaeagnus umbellata*) and intergeneric (between *Shepherdia canadensis* and *Elaeagnus* spp.) identity by t-tests.

|                                           | <i>Shepherdia canadensis</i> | <i>Elaeagnus angustifolia</i> | <i>Elaeagnus commutata</i> | <i>Elaeagnus multiflora</i> | <i>Elaeagnus pungens</i> | <i>Elaeagnus umbellata</i> Fortunella | <i>Elaeagnus umbellata</i> Brilliant Rose | <i>Elaeagnus umbellata</i> B | <i>Elaeagnus umbellata</i> Sweet'n'Sour |
|-------------------------------------------|------------------------------|-------------------------------|----------------------------|-----------------------------|--------------------------|---------------------------------------|-------------------------------------------|------------------------------|-----------------------------------------|
| <i>Elaeagnus angustifolia</i>             | 41,67±0,23                   | 96,07±0,47                    | 60,83±0,25                 | 57,03±0,26                  | 58,67±0,20               | 56,87±0,18                            | 56,81±0,19                                | 55,57±0,11                   | 55,17±0,18                              |
| <i>Elaeagnus commutata</i>                | 41,80±0,22                   | 60,83±0,25                    | 96,30±0,59                 | 60,56±0,15                  | 60,93±0,19               | 62,12±0,18                            | 61,29±0,10                                | 61,13±0,07                   | 61,60±0,27                              |
| <i>Elaeagnus multiflora</i>               | 41,80±0,22                   | 57,03±0,26                    | 60,56±0,15                 | 95,70±0,59                  | 84,50±0,18               | 95,56±0,26                            | 95,54±0,20                                | 95,53±0,12                   | 97,20±0,55                              |
| <i>Elaeagnus pungens</i>                  | 45,67±0,41                   | 58,67±0,20                    | 60,93±0,19                 | 84,50±0,18                  | 95,00±0,71               | 84,00±0,00                            | 84,95±0,18                                | 84,58±0,11                   | 86,00±0,00                              |
| <i>Elaeagnus umbellata</i> Fortunella     | 42,40±0,27                   | 56,87±0,18                    | 62,12±0,18                 | 95,56±0,26                  | 84,00±0,00               | 96,10±0,48                            | 95,51±0,15                                | 95,31±0,12                   | 97,40±0,27                              |
| <i>Elaeagnus umbellata</i> Brilliant Rose | 41,43±0,32                   | 56,81±0,19                    | 61,29±0,10                 | 95,54±0,20                  | 84,95±0,18               | 95,51±0,15                            | 95,48±0,23                                | 95,23±0,13                   | 97,43±0,32                              |
| <i>Elaeagnus umbellata</i> B              | 42,06±0,11                   | 55,57±0,11                    | 61,13±0,07                 | 95,53±0,12                  | 84,58±0,11               | 95,31±0,12                            | 95,23±0,13                                | 95,78±0,17                   | 96,94±0,96                              |
| <i>Elaeagnus umbellata</i> Sweet'n'Sour   | 42,00±0,00                   | 55,17±0,18                    | 61,60±0,27                 | 97,20±0,55                  | 86,00±0,00               | 97,40±0,27                            | 97,43±0,32                                | 96,94±0,96                   |                                         |

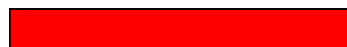

- average value of intergeneric identity, which is compared with correspond intraspecies values in line

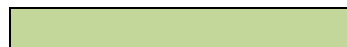

- differences are statistically significant

| The empirical values of t-criteria           |                              |                               |                            |                             |                          |                                          |                                              |                                 |                                            |
|----------------------------------------------|------------------------------|-------------------------------|----------------------------|-----------------------------|--------------------------|------------------------------------------|----------------------------------------------|---------------------------------|--------------------------------------------|
|                                              | <i>Shepherdia canadensis</i> | <i>Elaeagnus angustifolia</i> | <i>Elaeagnus commutata</i> | <i>Elaeagnus multiflora</i> | <i>Elaeagnus pungens</i> | <i>Elaeagnus umbellata</i><br>Fortunella | <i>Elaeagnus umbellata</i><br>Brilliant Rose | <i>Elaeagnus umbellata</i><br>B | <i>Elaeagnus umbellata</i><br>Sweet'n'Sour |
| <i>Elaeagnus angustifolia</i>                |                              | 73,8                          | 33,5                       | 25                          | 46,3                     | 36,3                                     | 29,9                                         | 30,6                            | 51,9                                       |
| <i>Elaeagnus commutata</i>                   |                              | 30,5                          | 66,7                       | 56,3                        | 56,5                     | 49,8                                     | 67,3                                         | 70,7                            | 63,9                                       |
| <i>Elaeagnus multiflora</i>                  |                              | 22,7                          | 56,3                       | 66                          | 131,7                    | 93                                       | 96,6                                         | 106,9                           | 106,5                                      |
| <i>Elaeagnus pungens</i>                     |                              | 25,5                          | 35                         | 93,1                        | 74,7                     | 269,9                                    | 80,9                                         | 86                              | 122,2                                      |
| <i>Elaeagnus umbellata</i><br>Fortunella     |                              | 31,6                          | 47,8                       | 91,5                        | 312                      | 78,8                                     | 129,5                                        | 104,4                           | 161,8                                      |
| <i>Elaeagnus umbellata</i><br>Brilliant Rose |                              | 32,2                          | 73,9                       | 112,1                       | 124,5                    | 149,7                                    | 126,4                                        | 100,8                           | 133,3                                      |
| <i>Elaeagnus umbellata</i> B                 |                              | 48,2                          | 120,6                      | 188,5                       | 209,6                    | 186,5                                    | 150,9                                        | 113,8                           | 203,3                                      |
| <i>Elaeagnus umbellata</i><br>Sweet'n'Sour   |                              | 29,9                          | 32,7                       | 46                          | 54,3                     | 92,3                                     | 65,9                                         | 53,4                            |                                            |

| The critical values of t-criteria            |                              |                               |                            |                             |                          |                                          |                                              |                                 |                                            |
|----------------------------------------------|------------------------------|-------------------------------|----------------------------|-----------------------------|--------------------------|------------------------------------------|----------------------------------------------|---------------------------------|--------------------------------------------|
|                                              | <i>Shepherdia canadensis</i> | <i>Elaeagnus angustifolia</i> | <i>Elaeagnus commutata</i> | <i>Elaeagnus multiflora</i> | <i>Elaeagnus pungens</i> | <i>Elaeagnus umbellata</i><br>Fortunella | <i>Elaeagnus umbellata</i><br>Brilliant Rose | <i>Elaeagnus umbellata</i><br>B | <i>Elaeagnus umbellata</i><br>Sweet'n'Sour |
| <i>Elaeagnus angustifolia</i>                |                              | 2,09                          | 2,03                       | 2,03                        | 2,07                     | 2,03                                     | 2,01                                         | 1,98                            | 2,23                                       |
| <i>Elaeagnus commutata</i>                   |                              | 2,04                          | 2,16                       | 2,05                        | 2,1                      | 2,05                                     | 2,02                                         | 1,99                            | 2,31                                       |
| <i>Elaeagnus multiflora</i>                  |                              | 2,04                          | 2,05                       | 2,16                        | 2,1                      | 2,05                                     | 2,02                                         | 1,99                            | 2,31                                       |
| <i>Elaeagnus pungens</i>                     |                              | 2,09                          | 2,12                       | 2,12                        | 2,78                     | 2,12                                     | 2,07                                         | 2                               | 2,78                                       |
| <i>Elaeagnus umbellata</i><br>Fortunella     |                              | 2,03                          | 2,05                       | 2,05                        | 2,1                      | 2,16                                     | 2,02                                         | 1,99                            | 2,31                                       |
| <i>Elaeagnus umbellata</i><br>Brilliant Rose |                              | 2,01                          | 2,02                       | 2,02                        | 2,06                     | 2,02                                     | 2,06                                         | 1,97                            | 2,18                                       |
| <i>Elaeagnus umbellata</i> B                 |                              | 1,97                          | 1,98                       | 1,98                        | 1,99                     | 1,98                                     | 1,97                                         | 1,97                            | 2,04                                       |
| <i>Elaeagnus umbellata</i><br>Sweet'n'Sour   |                              | 2,57                          | 2,78                       | 2,78                        | 2,78                     | 2,78                                     | 2,45                                         | 2,13                            |                                            |
