# Supplementary material for: A Comparative Study of 5S rDNA Non-Transcribed Spacers in Elaeagnaceae Species
Source: MDPI journal article supplement (doi:10.3390/plants10010004), 2020-12-23
Supplement: s1 [file s1]

**Table S7.** A comparative analysis of the average levels of interspecies (intervariety for *Elaeagnus umbellata*) and intergeneric (between *Shepherdia argentea* and *Elaeagnus* spp.) identity by t-tests.

|                                              | <i>Shepherdia argentea</i> | <i>Elaeagnus angustifolia</i> | <i>Elaeagnus commutata</i> | <i>Elaeagnus multiflora</i> | <i>Elaeagnus pungens</i> | <i>Elaeagnus umbellata</i><br>Fortunella | <i>Elaeagnus umbellata</i><br>Brilliant Rose | <i>Elaeagnus umbellata</i><br>B | <i>Elaeagnus umbellata</i><br>Sweet'n'Sour |
|----------------------------------------------|----------------------------|-------------------------------|----------------------------|-----------------------------|--------------------------|------------------------------------------|----------------------------------------------|---------------------------------|--------------------------------------------|
| <i>Elaeagnus angustifolia</i>                | 30,60±0,47                 | 96,07±0,47                    | 60,83±0,25                 | 57,03±0,26                  | 58,67±0,20               | 56,87±0,18                               | 56,81±0,19                                   | 55,57±0,11                      | 55,17±0,18                                 |
| <i>Elaeagnus commutata</i>                   | 31,32±0,49                 | 60,83±0,25                    | 96,30±0,59                 | 60,56±0,15                  | 60,93±0,19               | 62,12±0,18                               | 61,29±0,10                                   | 61,13±0,07                      | 61,60±0,27                                 |
| <i>Elaeagnus multiflora</i>                  | 31,12±0,25                 | 57,03±0,26                    | 60,56±0,15                 | 95,70±0,59                  | 84,50±0,18               | 95,56±0,26                               | 95,54±0,20                                   | 95,53±0,12                      | 97,20±0,55                                 |
| <i>Elaeagnus pungens</i>                     | 33,67±0,35                 | 58,67±0,20                    | 60,93±0,19                 | 84,50±0,18                  | 95,00±0,71               | 84,00±0,00                               | 84,95±0,18                                   | 84,58±0,11                      | 86,00±0,00                                 |
| <i>Elaeagnus umbellata</i><br>Fortunella     | 33,76±0,28                 | 56,87±0,18                    | 62,12±0,18                 | 95,56±0,26                  | 84,00±0,00               | 96,10±0,48                               | 95,51±0,15                                   | 95,31±0,12                      | 97,40±0,27                                 |
| <i>Elaeagnus umbellata</i><br>Brilliant Rose | 32,46±0,35                 | 56,81±0,19                    | 61,29±0,10                 | 95,54±0,20                  | 84,95±0,18               | 95,51±0,15                               | 95,48±0,23                                   | 95,23±0,13                      | 97,43±0,32                                 |
| <i>Elaeagnus umbellata</i> B                 | 30,94±0,19                 | 55,57±0,11                    | 61,13±0,07                 | 95,53±0,12                  | 84,58±0,11               | 95,31±0,12                               | 95,23±0,13                                   | 95,78±0,17                      | 96,94±0,96                                 |
| <i>Elaeagnus umbellata</i><br>Sweet'n'Sour   | 33,40±0,57                 | 55,17±0,18                    | 61,60±0,27                 | 97,20±0,55                  | 86,00±0,00               | 97,40±0,27                               | 97,43±0,32                                   | 96,94±0,96                      |                                            |

- average value of intergeneric identity, which is compared with correspond intraspecies values in line

- differences are statistically significant

| The empirical values of t-criteria           |                            |                               |                            |                             |                          |                                          |                                              |                                 |                                            |
|----------------------------------------------|----------------------------|-------------------------------|----------------------------|-----------------------------|--------------------------|------------------------------------------|----------------------------------------------|---------------------------------|--------------------------------------------|
|                                              | <i>Shepherdia argentea</i> | <i>Elaeagnus angustifolia</i> | <i>Elaeagnus commutata</i> | <i>Elaeagnus multiflora</i> | <i>Elaeagnus pungens</i> | <i>Elaeagnus umbellata</i><br>Fortunella | <i>Elaeagnus umbellata</i><br>Brilliant Rose | <i>Elaeagnus umbellata</i><br>B | <i>Elaeagnus umbellata</i><br>Sweet'n'Sour |
| <i>Elaeagnus angustifolia</i>                |                            | 109,4                         | 70,3                       | 60,1                        | 57,5                     | 66,4                                     | 70                                           | 88,3                            | 30,3                                       |
| <i>Elaeagnus commutata</i>                   |                            | 57,3                          | 77,5                       | 59,7                        | 46,5                     | 60,4                                     | 71                                           | 103                             | 27,8                                       |
| <i>Elaeagnus multiflora</i>                  |                            | 69,8                          | 105,1                      | 123,2                       | 154,4                    | 184,1                                    | 200,5                                        | 245,9                           | 110,9                                      |
| <i>Elaeagnus pungens</i>                     |                            | 67                            | 73,7                       | 138,2                       | 77,1                     | 152,5                                    | 146,8                                        | 188,2                           | 68,5                                       |
| <i>Elaeagnus umbellata</i><br>Fortunella     |                            | 72,4                          | 88,6                       | 167                         | 139                      | 118,3                                    | 209,8                                        | 225,8                           | 99,5                                       |
| <i>Elaeagnus umbellata</i><br>Brilliant Rose |                            | 63,4                          | 77,9                       | 153,9                       | 109,2                    | 165,9                                    | 128                                          | 203,8                           | 79,9                                       |
| <i>Elaeagnus umbellata</i> B                 |                            | 115,3                         | 149,9                      | 293,6                       | 205,2                    | 292,6                                    | 286,4                                        | 248,1                           | 149,1                                      |
| <i>Elaeagnus umbellata</i><br>Sweet'n'Sour   |                            | 43,9                          | 50,4                       | 91,1                        | 77,4                     | 114,3                                    | 115,8                                        | 120,5                           |                                            |

| The critical values of t-criteria            |                            |                               |                            |                             |                          |                                          |                                              |                                 |                                            |
|----------------------------------------------|----------------------------|-------------------------------|----------------------------|-----------------------------|--------------------------|------------------------------------------|----------------------------------------------|---------------------------------|--------------------------------------------|
|                                              | <i>Shepherdia argentea</i> | <i>Elaeagnus angustifolia</i> | <i>Elaeagnus commutata</i> | <i>Elaeagnus multiflora</i> | <i>Elaeagnus pungens</i> | <i>Elaeagnus umbellata</i><br>Fortunella | <i>Elaeagnus umbellata</i><br>Brilliant Rose | <i>Elaeagnus umbellata</i><br>B | <i>Elaeagnus umbellata</i><br>Sweet'n'Sour |
| <i>Elaeagnus angustifolia</i>                |                            | 2,02                          | 2                          | 2                           | 2,01                     | 2                                        | 1,99                                         | 1,97                            | 2,03                                       |
| <i>Elaeagnus commutata</i>                   |                            | 2                             | 2,04                       | 2,01                        | 2,02                     | 2,01                                     | 2                                            | 2,61                            | 2,05                                       |
| <i>Elaeagnus multiflora</i>                  |                            | 2                             | 2,01                       | 2,04                        | 2,02                     | 2,01                                     | 2,66                                         | 1,97                            | 2,05                                       |
| <i>Elaeagnus pungens</i>                     |                            | 2,04                          | 2,05                       | 2,05                        | 2,12                     | 2,05                                     | 2,03                                         | 1,99                            | 2,15                                       |
| <i>Elaeagnus umbellata</i><br>Fortunella     |                            | 2                             | 2,01                       | 2,01                        | 2,02                     | 2,04                                     | 2                                            | 1,97                            | 2,05                                       |
| <i>Elaeagnus umbellata</i><br>Brilliant Rose |                            | 1,99                          | 1,99                       | 1,99                        | 2                        | 1,99                                     | 2                                            | 1,97                            | 2,02                                       |
| <i>Elaeagnus umbellata</i> B                 |                            | 1,97                          | 1,97                       | 1,97                        | 1,97                     | 1,97                                     | 1,97                                         | 1,97                            | 1,98                                       |
| <i>Elaeagnus umbellata</i><br>Sweet'n'Sour   |                            | 2,26                          | 2,31                       | 2,31                        | 2,45                     | 2,31                                     | 2,33                                         | 2,09                            |                                            |
