# Supplementary material for: A Comparative Study of 5S rDNA Non-Transcribed Spacers in Elaeagnaceae Species
Source: MDPI journal article supplement (doi:10.3390/plants10010004), 2020-12-23
Supplement: s1 [file s1]

**Table S6.** A comparative analysis of the average levels of interspecies (intervariety for *Elaeagnus umbellata*) identity by t-tests.

|                                              | <i>Elaeagnus angustifolia</i> | <i>Elaeagnus commutata</i> | <i>Elaeagnus multiflora</i> | <i>Elaeagnus pungens</i> | <i>Elaeagnus umbellata</i><br>Fortunella | <i>Elaeagnus umbellata</i><br>Brilliant<br>Rose | <i>Elaeagnus umbellata</i><br>B | <i>Elaeagnus umbellata</i><br>Sweet'n'Sour |
|----------------------------------------------|-------------------------------|----------------------------|-----------------------------|--------------------------|------------------------------------------|-------------------------------------------------|---------------------------------|--------------------------------------------|
| <i>Elaeagnus angustifolia</i>                | 96,07±0,47                    | 60,83±0,25                 | 57,03±0,26                  | 58,67±0,20               | 56,87±0,18                               | 56,81±0,19                                      | 55,57±0,11                      | 55,17±0,18                                 |
| <i>Elaeagnus commutata</i>                   | 60,83±0,25                    | 96,30±0,59                 | 60,56±0,15                  | 60,93±0,19               | 62,12±0,18                               | 61,29±0,10                                      | 61,13±0,07                      | 61,60±0,27                                 |
| <i>Elaeagnus multiflora</i>                  | 57,03±0,26                    | 60,56±0,15                 | 95,70±0,59                  | 84,50±0,18               | 95,56±0,26                               | 95,54±0,20                                      | 95,53±0,12                      | 97,20±0,55                                 |
| <i>Elaeagnus pungens</i>                     | 58,67±0,20                    | 60,93±0,19                 | 84,50±0,18                  | 95,00±0,71               | 84,00±0,00                               | 84,95±0,18                                      | 84,58±0,11                      | 86,00±0,00                                 |
| <i>Elaeagnus umbellata</i><br>Fortunella     | 56,87±0,18                    | 62,12±0,18                 | 95,56±0,26                  | 84,00±0,00               | 96,10±0,48                               | 95,51±0,15                                      | 95,31±0,12                      | 97,40±0,27                                 |
| <i>Elaeagnus umbellata</i><br>Brilliant Rose | 56,81±0,19                    | 61,29±0,10                 | 95,54±0,20                  | 84,95±0,18               | 95,51±0,15                               | 95,48±0,23                                      | 95,23±0,13                      | 97,43±0,32                                 |
| <i>Elaeagnus umbellata</i> B                 | 55,57±0,11                    | 61,13±0,07                 | 95,53±0,12                  | 84,58±0,11               | 95,31±0,12                               | 95,23±0,13                                      | 95,78±0,17                      | 96,94±0,96                                 |

 - the average value of intraspecies identity, which is compared with correspond values in line

 - the differences are statistically significant

 - the differences are not statistically significant

 - the empirical values of the t-criteria are in the zone of uncertainty

The empirical values of t-criteria

|                                              | <i>Elaeagnus angustifolia</i> | <i>Elaeagnus commutata</i> | <i>Elaeagnus multiflora</i> | <i>Elaeagnus pungens</i> | <i>Elaeagnus umbellata</i><br>Fortunella | <i>Elaeagnus umbellata</i><br>Brilliant<br>Rose | <i>Elaeagnus umbellata</i><br>B | <i>Elaeagnus umbellata</i><br>Sweet'n'Sour |
|----------------------------------------------|-------------------------------|----------------------------|-----------------------------|--------------------------|------------------------------------------|-------------------------------------------------|---------------------------------|--------------------------------------------|
| <i>Elaeagnus angustifolia</i>                |                               | 74,2                       | 78,7                        | 80,4                     | 97,1                                     | 95,2                                            | 121                             | 55,8                                       |
| <i>Elaeagnus commutata</i>                   | 66                            |                            | 86,5                        | 70,2                     | 76,8                                     | 99,7                                            | 131,3                           | 42,2                                       |
| <i>Elaeagnus multiflora</i>                  | 59,5                          | 85                         |                             | 21,8                     | 0,3                                      | 0,3                                             | 0,4                             | 1,7                                        |
| <i>Elaeagnus pungens</i>                     | 67,9                          | 72,1                       | 22,3                        |                          | 49,2                                     | 19,8                                            | 22,5                            | 15,8                                       |
| <i>Elaeagnus umbellata</i><br>Fortunella     | 96,8                          | 85,1                       | 1,1                         | 32,7                     |                                          | 1,6                                             | 2                               | 2,2                                        |
| <i>Elaeagnus umbellata</i><br>Brilliant Rose | 125                           | 155,2                      | 0,2                         | 37,6                     | 0,1                                      |                                                 | 0,8                             | 4,6                                        |
| <i>Elaeagnus umbellata</i> B                 | 185,9                         | 160,8                      | 1,1                         | 40                       | 2                                        | 2,5                                             |                                 | 2,4                                        |

The critical values of t-criteria

|                                              | <i>Elaeagnus angustifolia</i> | <i>Elaeagnus commutata</i> | <i>Elaeagnus multiflora</i> | <i>Elaeagnus pungens</i> | <i>Elaeagnus umbellata</i><br>Fortunella | <i>Elaeagnus umbellata</i><br>Brilliant<br>Rose | <i>Elaeagnus umbellata</i><br>B | <i>Elaeagnus umbellata</i><br>Sweet'n'Sour |
|----------------------------------------------|-------------------------------|----------------------------|-----------------------------|--------------------------|------------------------------------------|-------------------------------------------------|---------------------------------|--------------------------------------------|
| <i>Elaeagnus angustifolia</i>                |                               | 2,02                       | 2,02                        | 2,04                     | 2,02                                     | 2                                               | 1,97                            | 2,09                                       |
| <i>Elaeagnus commutata</i>                   | 2,02                          |                            | 2,04                        | 2,07                     | 2,04                                     | 2,02                                            | 1,99                            | 2,16                                       |
| <i>Elaeagnus multiflora</i>                  | 2,08                          | 2,04                       |                             | 2,07                     | 2,04                                     | 2,02                                            | 1,99                            | 2,16                                       |
| <i>Elaeagnus pungens</i>                     | 2,09                          | 2,12                       | 2,12                        |                          | 2,12                                     | 2,07                                            | 2                               | 2,78                                       |
| <i>Elaeagnus umbellata</i><br>Fortunella     | 2,02                          | 2,04                       | 2,04                        | 2,07                     |                                          | 2,02                                            | 1,99/2,63*                      | 2,13/2,95*                                 |
| <i>Elaeagnus umbellata</i><br>Brilliant Rose | 1,99                          | 2                          | 2                           | 2,02                     | 2                                        |                                                 | 1,97                            | 2,06                                       |
| <i>Elaeagnus umbellata</i> B                 | 1,96                          | 1,97                       | 1,97                        | 1,97                     | 1,97/2,61                                | 1,96/2,58*                                      |                                 | 1,97/2,61                                  |

\*  $p \leq 0.05$  /  $p \leq 0.01$
